# Supplementary figures and images for: Effect of Ankle Weights as a Frailty Prevention Strategy in the Community-Dwelling Elderly: A Preliminary Report
Source: MDPI journal article supplement (doi:10.3390/ijerph19127350), 2022-06-15

Supplemental File  
fig. S1.

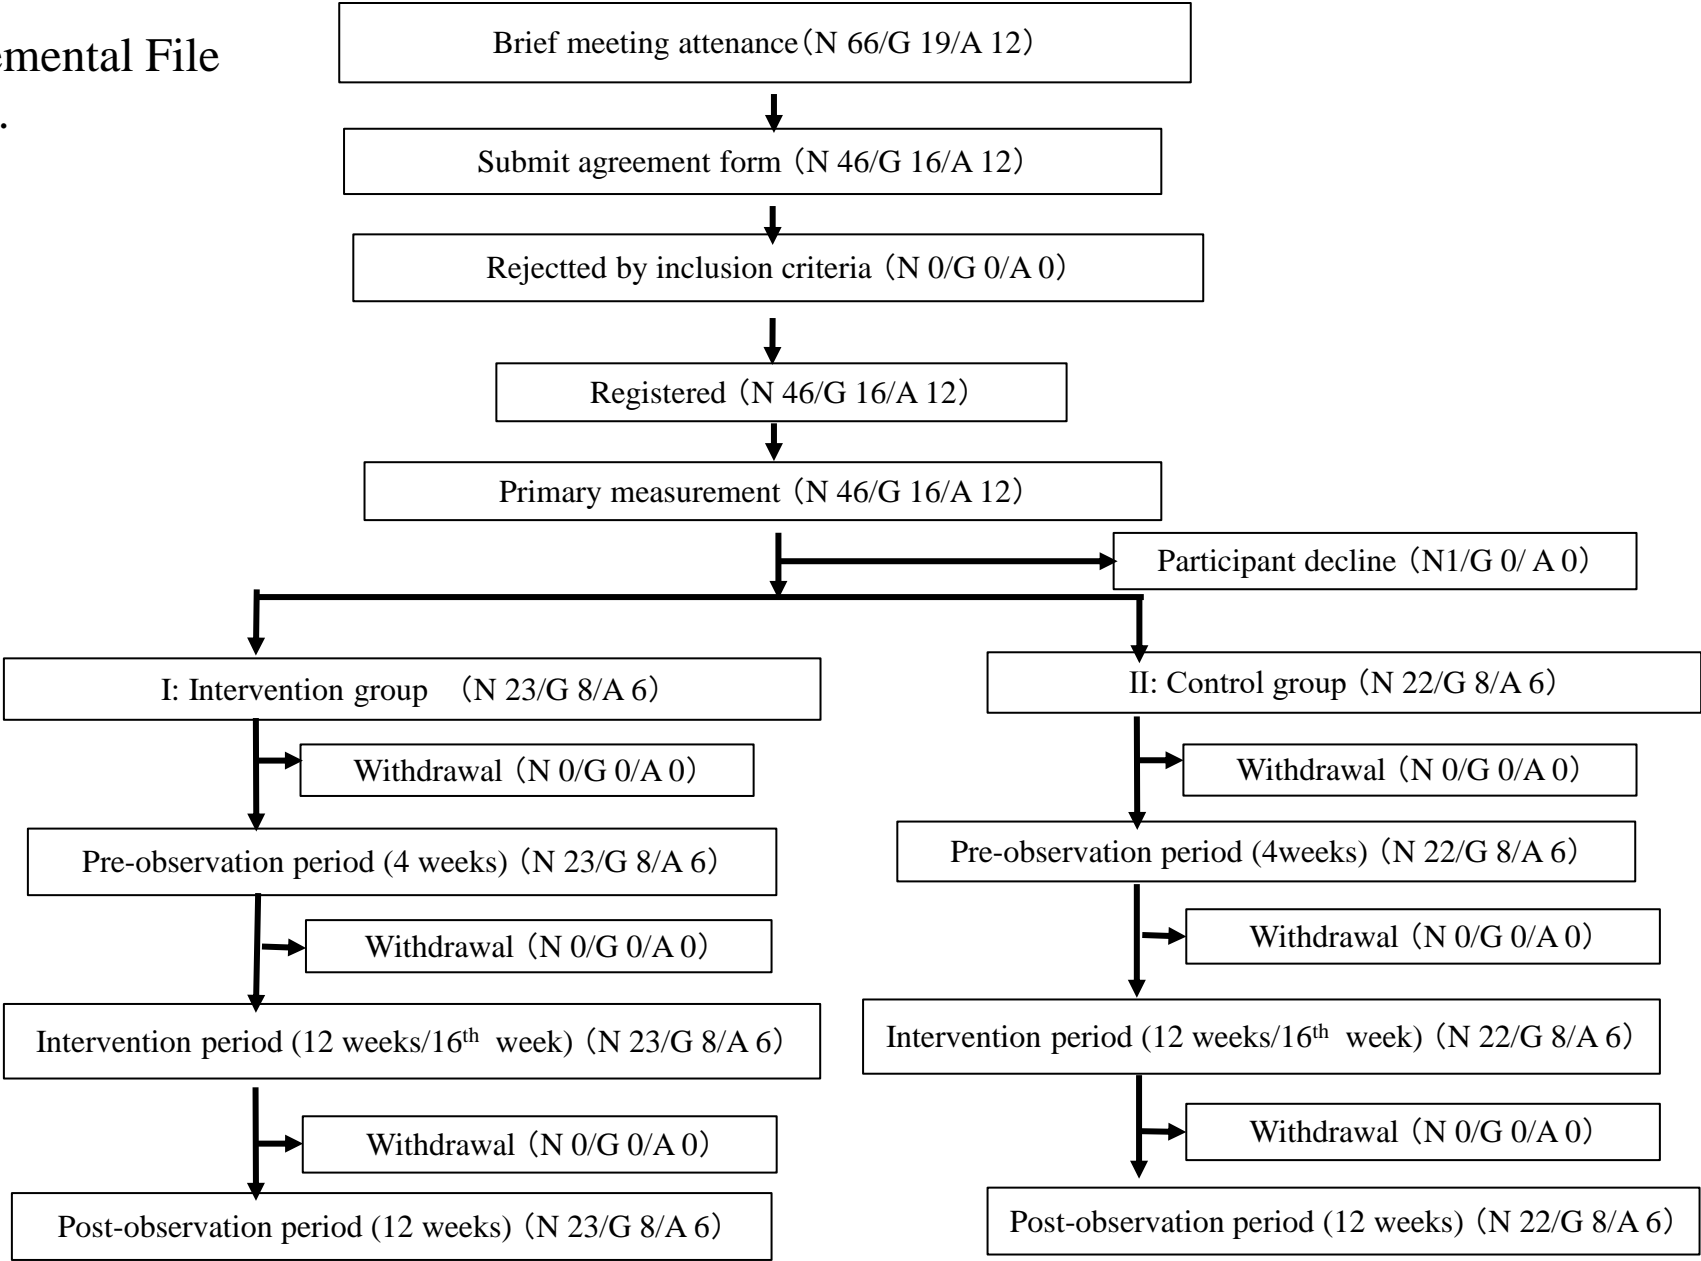

Supplement: s1 [file s1]
